# Supplementary material for: Effects of chronic low‐dose aspirin treatment on tumor prevention in three mouse models of intestinal tumorigenesis
Source: PubMed Central journal article supplement (PMC7131863; doi:10.1002/cam4.2881), 2020-01-29
Supplement: CAM4-9-2535-s001.pdf [file CAM4-9-2535-s001.pdf]

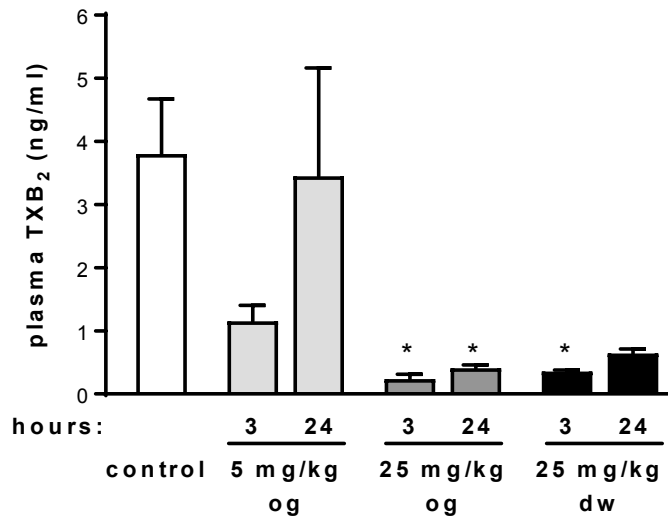

**Figure S1.** Plasma concentration of TXB<sub>2</sub> in healthy mice after aspirin administration. Mice (n = 3) were treated daily for 7 days with 5 or 25 mg/kg body weight of aspirin by oral gavage (og) or via drinking water (dw). Blood samples were collected 3 and 24 hours after the last aspirin dose. \**P* < .05 by unpaired Student's *t* test.

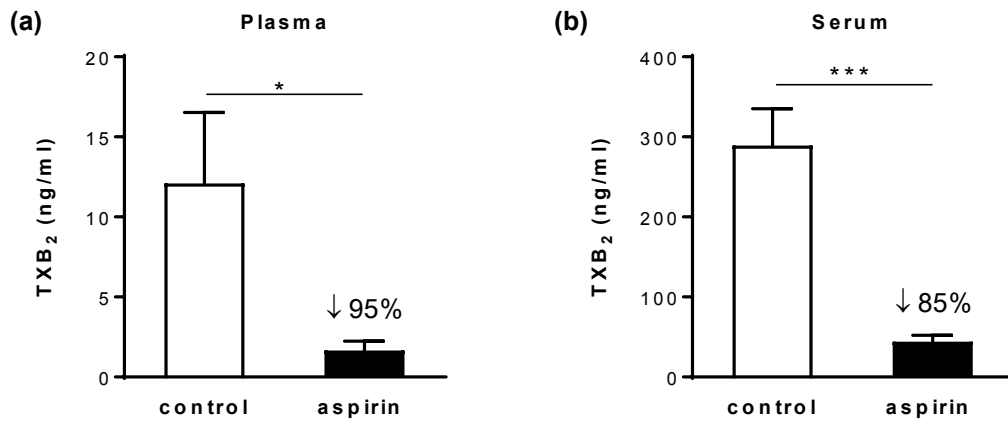

**Figure S2.** Plasma (a) and serum (b) concentration of TXB<sub>2</sub> in healthy mice after aspirin administration. Mice (n = 6) were treated daily for 7 days with 25 mg/kg body weight of aspirin via drinking water. Blood samples were collected 3 hours after the last aspirin dose. \**P* < .05, \*\*\**P* < .001 by unpaired Student's *t* test.

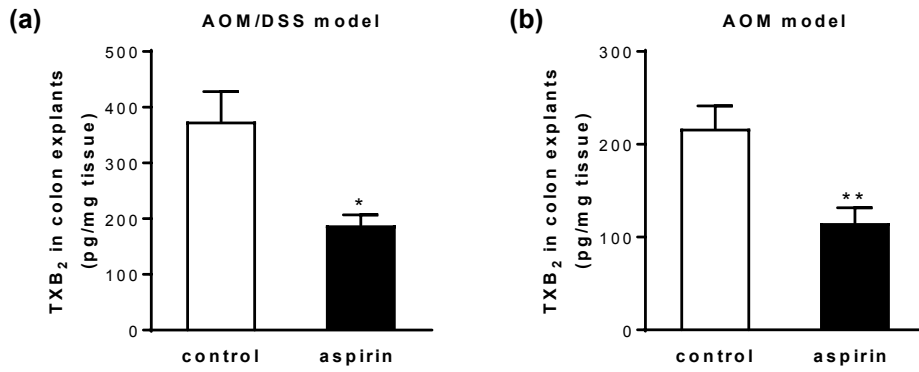

**Figure S3.** TXB<sub>2</sub> level in AOM/DSS- (a) and AOM-induced (b) murine colon tumors treated with aspirin. TXB<sub>2</sub> concentrations in culture supernatants from colon explants of aspirin-treated mice (25 mg/kg/day via drinking water) at the end of the AOM/DSS (n = 5/group, a) or AOM (n = 9/group, b) study. \* $P < .05$ , \*\* $P < .01$  by unpaired Student's *t* test.

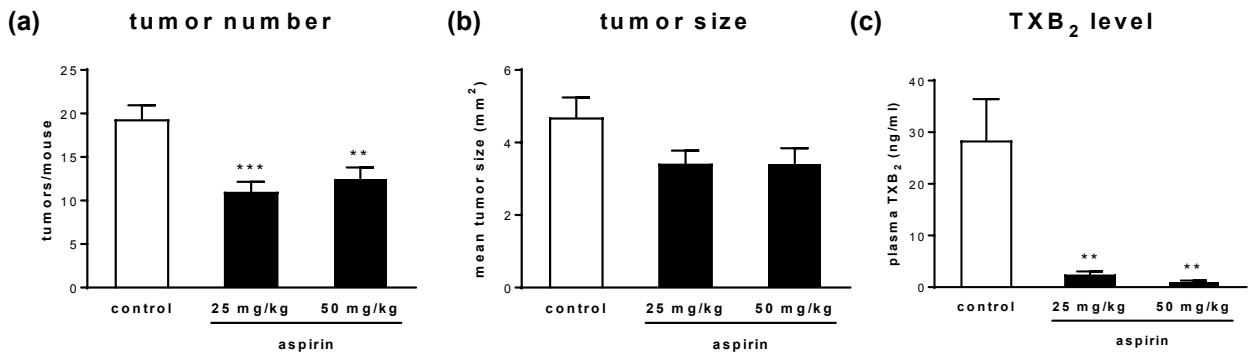

**Figure S4.** Aspirin dose dependency in the AOM/DSS model. (a) Tumor number, (b) tumor size and (c) plasma TXB<sub>2</sub> concentration of mice (n = 9/group) after 12 weeks of aspirin (25 or 50 mg/kg/day, via drinking water) administration in the AOM/DSS model. \*\**P* < .01, \*\*\**P* < .001 by unpaired Student's *t* test.

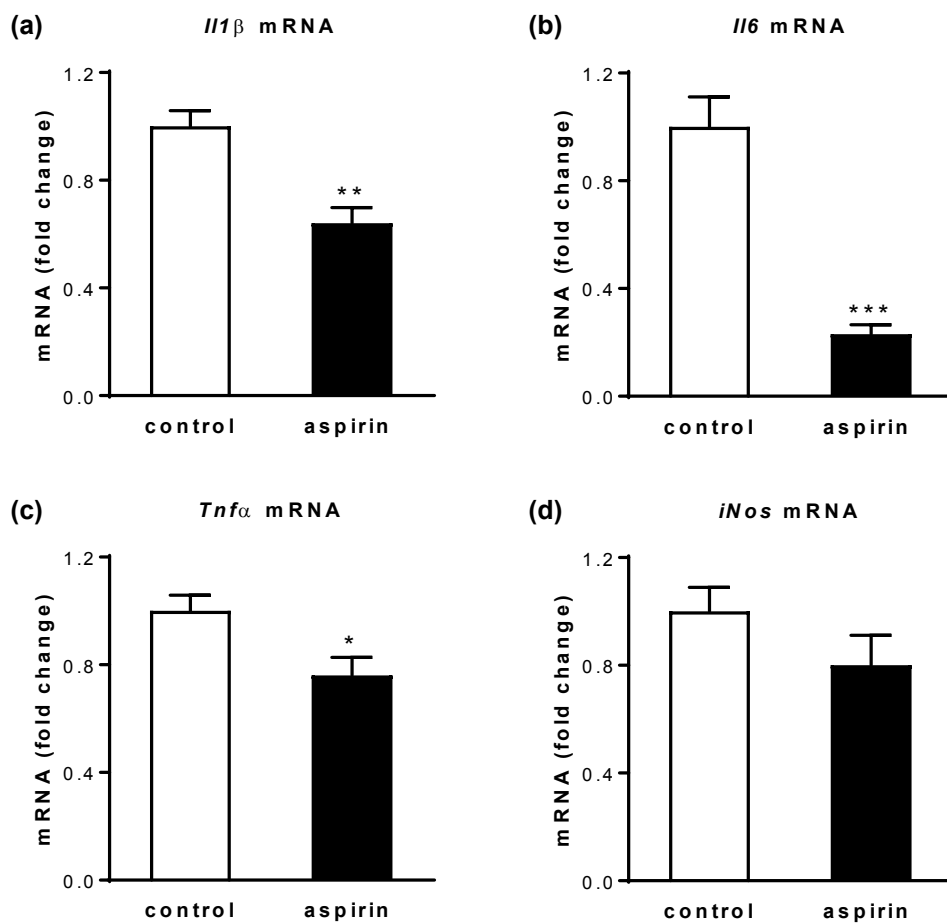

**Figure S5.** Quantitative qPCR analysis of pro-inflammatory genes. Relative mRNA expression of pro-inflammatory genes *Il1β* (a), *Il6* (b), *Tnfα* (c) and *iNos* (d) in colon tumors of control and aspirin-treated (25 mg/kg/day) mice (n = 5/group) following the AOM/DSS protocol. \* $P < .05$ , \*\* $P < .01$ , \*\*\* $P < .001$  by unpaired Student's  $t$  test.
