# Supplementary material for: Effects of chronic low‐dose aspirin treatment on tumor prevention in three mouse models of intestinal tumorigenesis
Source: PubMed Central journal article supplement (PMC7131863; doi:10.1002/cam4.2881), 2020-01-29
Supplement: CAM4-9-2535-s002.pdf [file CAM4-9-2535-s002.pdf]

**Table S1.** Murine primer sequences

| <b>Primer</b>                                | <b>Sequence</b>              |
|----------------------------------------------|------------------------------|
| <i>Axin2</i> forward primer                  | TTGACTGGGTCGCTTCTCTT         |
| <i>Axin2</i> reverse primer                  | GGGGGAAAACACAGCTTACA         |
| <i>Ciap1</i> forward primer                  | GGAAATTGACCCTGCGTTATACAGA    |
| <i>Ciap1</i> reverse primer                  | TCTCGGTCCATACACACTTTACACATT  |
| <i>Ciap2</i> forward primer                  | GGAAATTGACTCCACGTTATATGAAAAC |
| <i>Ciap2</i> reverse primer                  | GCTCTTCCAATGACAAGCCTGA       |
| <i>Eef2</i> forward primer*                  | CTGCCTGTCAATGAGTCC           |
| <i>Eef2</i> reverse primer*                  | AGTATCAGGCTGCCTACAGT         |
| <i>Hprt1</i> forward primer*                 | TGGATACAGGCCAGACTTTTGTT      |
| <i>Hprt1</i> reverse primer*                 | CAGATTCAACTTGCGCTCATC        |
| <i>Il-1<math>\beta</math></i> forward primer | CAACCAACAAGTGATATTCTCCATG    |
| <i>Il-1<math>\beta</math></i> reverse primer | GATCCACACTCTCCAGCTGCA        |
| <i>Il-6</i> forward primer                   | TGAGAAAAGAGTTGTGCAATGGC      |
| <i>Il-6</i> reverse primer                   | GCATCCATCATTTCTTTGTATCTCTGG  |
| <i>iNos</i> forward primer                   | ACCCTAAGAGTCACCAAATGGC       |
| <i>iNos</i> reverse primer                   | TTGATCCTCACATACTGTGGACG      |
| <i>Pgk1</i> forward primer                   | CAAATTTGATGAGAATGCCAAGACT    |
| <i>Pgk1</i> reverse primer                   | TTCTTGCTGCTCTCAGTACCACA      |
| <i>Plau</i> forward primer                   | GCCTGCTGTCTTCAGAAAC          |
| <i>Plau</i> reverse primer                   | TAGAGCCTTCTGGCCACACT         |
| <i>Rpl13a</i> forward primer*                | GCTTACCTGGGGCGTCTG           |
| <i>Rpl13a</i> reverse primer*                | ACATTCTTTTCTGCCTGTTTCC       |
| <i>Tnfa</i> forward primer                   | CCATTCCCTGAGTTCTGCAAAGG      |
| <i>Tnfa</i> reverse primer                   | AGGTAGGAAGGCCTGAGATCTTATC    |
| <i>Vegfa</i> forward primer                  | AGTCCCATGAAGTGATCAAGTTCA     |
| <i>Vegfa</i> reverse primer                  | ATCCGCATGATCTGCATGG          |

\* primer sequence of housekeeping gene

**Table S2.** Reduction of plasma TXB<sub>2</sub> level by aspirin treatment  
(% of the untreated control group)

| <b>Time after last aspirin dose</b> | <b>3 hours</b> | <b>24 hours</b> |
|-------------------------------------|----------------|-----------------|
| <b>5 mg/kg og</b>                   | 69.77 ± 9.61   | 9.34 ± 49.66    |
| <b>25 mg/kg og</b>                  | 93.75 ± 2.41   | 89.34 ± 2.83    |
| <b>25 mg/kg dw</b>                  | 90.67 ± 2.22   | 83.09 ± 4.30    |
